# Supplementary material for: The dynamics of Mothers Burnout in Arab Countries
Source: Research Square preprint supplement (doi:10.21203/rs.3.rs-7423321/v1), 2025-09-15
Supplement: Supplementary file 1 [file 0c41ba0261fdd0569b2451d4.docx]

**The dynamics of Mothers Burnout in Arab Countries**

**Supplemental materials**

**Table (1-S) Mothers Burnout Model and variables significance**

Outcome: Mothers’ Burnout_

Model Summary

R R-sq MSE F df1 df2 p

.685 .469 599.780 61.715 19.000 1188.000 .000

Model

coeff se t p LLCI ULCI

constant -1.038 8.474 -.123 .902 -17.665 15.588

External 2.657 .413 6.426 .000 1.846 3.468

Anxiety .276 .265 1.044 .297 -.243 .795

Depressi 1.120 .258 4.334 .000 .613 1.627

Working_ .256 .209 1.225 .221 -.154 .666

Inhibiti -.329 .321 -1.024 .306 -.959 .301

Cognitiv 1.016 .345 2.949 .003 .340 1.692

CPTSD .752 .095 7.906 .000 .565 .938

Attach_A .116 .337 .346 .730 -.544 .777

int_5 .012 .027 .454 .650 -.041 .066

Attachme -.237 .279 -.849 .396 -.783 .310

int_6 -.015 .025 -.585 .559 -.065 .035

int_7 .029 .105 .281 .779 -.177 .236

int_8 .007 .008 .964 .335 -.008 .022

age -.064 .079 -.804 .421 -.219 .092

work .552 .677 .815 .416 -.777 1.880

socialst -.376 1.176 -.320 .749 -2.682 1.931

healthst -.690 1.205 -.573 .567 -3.054 1.674

incomefo -3.676 1.769 -2.078 .038 -7.147 -.205

educatio .786 .943 .834 .405 -1.064 2.636

Table (2-S)

*Independent Samples T-Test*

t df p Cohen's d SE Cohen's d

| income | 5.284 | 1206 | < .001 | 0.486 | 0.093 |
| --- | --- | --- | --- | --- | --- |
| healthstate | 4.204 | 1206 | < .001 | 0.386 | 0.092 |
| resilievewith | −3.928 | 1206 | < .001 | −0.361 | 0.092 |
| GD_O | −1.030 | 1206 | 0.303 | −0.095 | 0.092 |
| PIT_O | −7.128 | 1206 | < .001ᵃ | −0.655 | 0.093 |
| Sexual_Abuse_O | −0.753 | 1206 | 0.451 | −0.069 | 0.092 |
| Physicall_Abuse_O | −8.844 | 1206 | < .001ᵃ | −0.813 | 0.094 |
| CollectiveId_T_O | −2.272 | 1206 | 0.023ᵃ | −0.209 | 0.092 |
| Discriminations_O | −2.272 | 1206 | 0.023ᵃ | −0.209 | 0.092 |
| Poverty_O | −7.416 | 1206 | < .001ᵃ | −0.682 | 0.093 |
| Torture_O | −1.090 | 1206 | 0.276 | −0.100 | 0.092 |
| Uprootedness_O | −3.187 | 1206 | 0.001ᵃ | −0.293 | 0.092 |
| Attachment_O | −0.526 | 1206 | 0.599 | −0.048 | 0.092 |
| Role_identity_T_O | −4.596 | 1206 | < .001ᵃ | −0.422 | 0.092 |
| Survival_T_O | −4.605 | 1206 | < .001ᵃ | −0.423 | 0.092 |
| Secondary_T_O | −4.231 | 1206 | < .001ᵃ | −0.389 | 0.092 |
| Chronic_Stressors_T_O−4.613 | | 1206 | < .001 | −0.424 | 0.092 |
| Perptration_T_O −7.632 | | 1206 | < .001ᵃ | −0.702 | 0.093 |
| Birthing_T_O −3.491 | | 1206 | < .001ᵃ | −0.321 | 0.092 |
| Community_Violence _5.436 | | 1206 | < .001ᵃ | −0.500 | 0.093 |
| Type_I_Trauma −5.625 | | 1206 | < .001ᵃ | −0.517 | 0.093 |
| Type_II_Trauma −6.943 | | 1206 | < .001ᵃ | −0.638 | 0.093 |
| Type_III_Trauma −3.639 | | 1206 | < .001 | −0.334 | 0.092 |
| Type_III_A_Trauma −3.388 | | 1206 | < .001ᵃ | −0.311 | 0.092 |
| Type_III_B_Trauma −2.174 | | 1206 | 0.030ᵃ | −0.200 | 0.092 |
| Type_III_C_Trauma 1.706 | | 1206 | 0.088 | 0.157 | 0.092 |
| Type_III_D_Trauma −5.436 | | 1206 | < .001ᵃ | −0.500 | 0.093 |
| Type_III_E_Trauma −3.716 | | 1206 | < .001ᵃ | −0.342 | 0.092 |

*Note.* Student's t-test.

ᵃ Brown-Forsythe test is significant (p < .05), suggesting a violation of the equal variance assumption
